# Supplementary material for: Nanoencapsulation of Pomegranate Extract to Increase Stability and Potential Dermatological Protection
Source: Preprints.org preprint supplement (doi:10.20944/preprints202012.0432.v1), 2020-12-17
Supplement: Supplementary file 3 [file supplementary]

**SUPPLEMENTAL FIGURES**

**
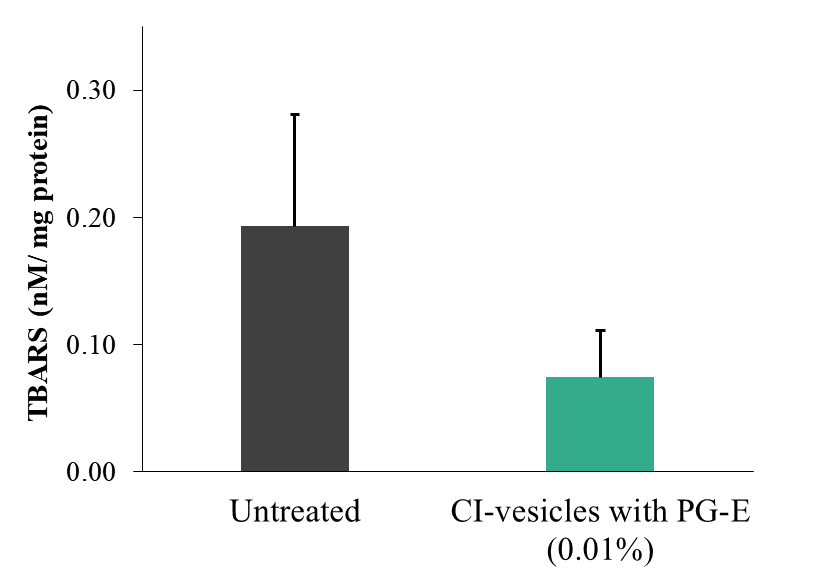
**

**Figure S1.-** TBARS (nM /mg protein) determined in HaCaT cells exposed to UV radiation after treatment for 24 hours with cauliflower inflorescence vesicles (CI-vesicles) with pomegranate extract (PG-E) (0.01%). Data are means ± SE (n = 6).
